# Supplementary material for: Flexibly assembled and readily detachable photovoltaics
Source: Royal Society of Chemistry journal article supplement (doi:10.1039/c7ee01889d), 2017-01-01
Supplement: c7ee01889d1.pdf [file c7ee01889d1.pdf]

## Supporting Information

### **Flexibly Assembled and Readily Detachable Photovoltaics**

*Shi Wang, Kaili Hou, Yujin Xing, Qingshun Dong, Kai Wang,  
Yanping Lv, and Yantao Shi\**

#### **Experimental section**

**Materials and Reagents:** Chlorobenzene (99.8%), tetrabutyl titanate (97%), 4-tert-butylpyridine (96%), lithium bis(trifluoromethylsulphonyl)imide (99%), acetonitrile (99.8%) and  $\text{PbI}_2$  (99%) were all purchased from Sigma-Aldrich. Dimethyl sulfoxide (99.7%, superdry), anhydrous alcohol (99.7%), N,N-dimethylformamide (99.8%, superdry), and 2-propanol (99.7%) were purchased from J&K Scientific Ltd.  $\text{TiO}_2$  paste was purchased from Dyesol (30 NRD) and Fluorine-doped tin oxide (FTO, 15  $\Omega/\text{sq}$ ) was purchased from Yingkou OPV Tech New Energy Co., Ltd.. Spiro-OMeTAD and  $\text{CH}_3\text{NH}_3\text{I}$  were purchased from Borun New Material Technology Co., Ltd and Xi'an Polymer Light Technology Corp, respectively.

**PEDOT:PSS dispersion preparation:** 40 mg solid PEDOT:PSS was dispersed into 5 ml 2-propanol, and 100  $\mu\text{L}$  TBP and 60  $\mu\text{L}$  Li salt were added. Then, the mixture was ball-milled for 5 h to achieve homogeneous dispersion.

**Fabrication of photoanode:** Firstly, FTO glass was patterned by etching with Zn powder and HCl solution, Then the FTO glass cleaned by deionized water and rinsed sequentially with deionized water, isopropanol and deionized water, finally dried with clean dry air.  $\text{TiO}_2$  organic sol was prepared by dissolving 16.5 mL of diethanolamine and 68 mL of tetrabutyl titanate in 210 mL anhydrous alcohol for  $\text{TiO}_2$  compact layer. Under ambient the mixture was stirred for 1 h (Solution A). A mixture of 3.6 mL  $\text{H}_2\text{O}$  and 100 mL ethanol (Solution B) was added dropwise into Solution A under stirring, then the solution was aged for 24 h at room temperature, finally diluted into 0.25 M

before used.  $\text{TiO}_2$  organic sol was spin coated on cleaned FTO at 3000 rpm for 30 s for compact  $\text{TiO}_2$  underlayer, followed by a sintering process in a furnace at  $450^\circ\text{C}$  for 30 min. A commercial  $\text{TiO}_2$  paste diluted in ethanol (1:6, weight ratio) was spin coated at 5000 rpm for 30 s on compact  $\text{TiO}_2$  underlayer preparing mesoporous  $\text{TiO}_2$  layer. The layer was dried at  $125^\circ\text{C}$  then heated to  $500^\circ\text{C}$  for 30 min and cooled to room temperature. To prepare  $\text{CH}_3\text{NH}_3\text{PbI}_3$  layer, 181.8 mg  $\text{CH}_3\text{NH}_3\text{I}$  and 577.5 mg of  $\text{PbI}_2$  was dissolved in 1 mL mixture solution consisting of DMF and DMSO (4:1, volume ratio). Precursor solution was stirring at  $60^\circ\text{C}$  for 2 h. Then, The perovskite solution was spin-coated on the mesoporous  $\text{TiO}_2$  film in a two-step program; first at 1000 rpm for 10 s and then at 5000 rpm for 30 s. During the second step, the spinning substrate was poured with 250  $\mu\text{L}$  of chlorobenzene 15 s prior the end of the program. The substrates were then annealed at  $85^\circ\text{C}$  for 20 min in a glove box. HTM precursor was prepared by dissolving 72.3 mg spiro-OMeTAD, 17.5 mL lithium bis(trifluoromethylsulfonyl)imide and 28.8 mL 4-tert-butylpyridine, acetonitrile solution (520  $\text{mg mL}^{-1}$ ) in 1 mL chlorobenzene. Then, HTM layer was deposited atop perovskite by spin coating at 3000 rpm for 30 s. Finally 250  $\mu\text{L}$  PEDOT:PSS precursor was sprayed on the HTM layer under  $90^\circ\text{C}$  on a hotplate.

***Fabrication of CE and S-PSCs:*** FTO glass was sprayed with 500  $\mu\text{L}$  PEDOT:PSS precursor under  $90^\circ\text{C}$  on a hotplate. For fabrication of S-PSCs, photoanode and CE were simply stacked together without extra processing.

***Characterization:*** Sample microscopic morphologies were characterized by scanning electron microscopy (SEM, FEI QUANTA 450). Linear sweep voltammetry (LSV) curves of FTO/PEDOT:PSS/PEDOT:PSS/FTO and FTO/TL-PEDOT:PSS/TL-PEDOT:PSS/FTO were measured using a Keithley 2601 source. The contact angle was measured with an optical CA meter (OCA20, Dataphysics) at room temperature. Electrochemical impedance spectroscopy (EIS) measurements were conducted with an electrochemical workstation (Zennium Zahner, Germany) in dark, under a 0.3 V forward bias and with a 20 mV amplitude of AC perturbation ranging from 100 mHz to 1 MHz.  $J-V$  curves of PSCs were obtained using a Keithley 2450 source meter scanning the devices at 0.2 V/s under simulated AM 1.5 G illumination ( $100 \text{ mW cm}^{-2}$ , Solar3A,

Newport), with a mask of 0.07065 cm<sup>2</sup>.

**Table S1.** Photovoltaic parameters of stacking structured PSCs with and without Spiro-OMeTAD

|                      | $J_{sc}$<br>(mA cm <sup>-2</sup> ) | $V_{oc}$<br>(V) | FF   | PCE<br>(%) |
|----------------------|------------------------------------|-----------------|------|------------|
| With Spiro-OMeTAD    | 7.24                               | 0.35            | 0.47 | 1.17       |
| Without Spiro-OMeTAD | 17.89                              | 0.77            | 0.61 | 8.39       |

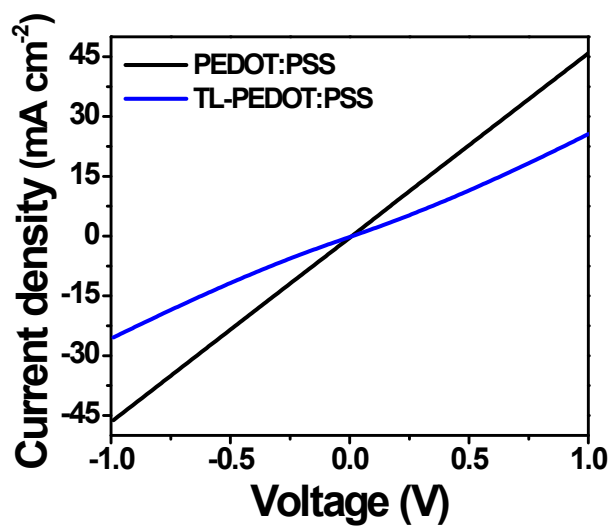

**Fig. S1.** Linear sweep voltammetry curves of FTO/PEDOT:PSS/PEDOT:PSS/FTO and FTO/TL-PEDOT:PSS/TL-PEDOT:PSS/FTO

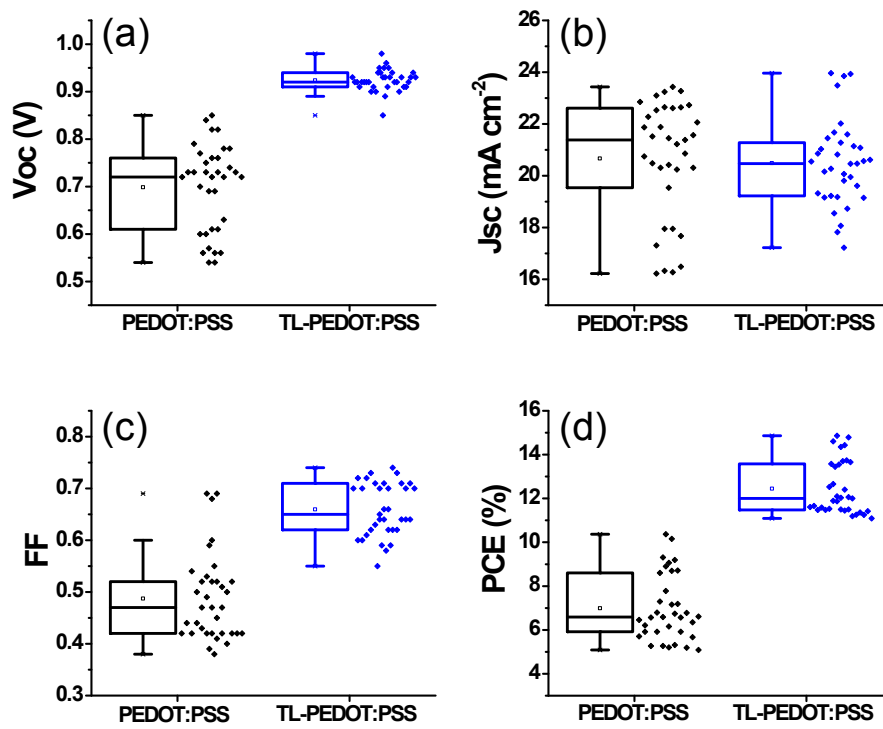

**Fig. S2.** Box charts exhibiting the statistical features of (a)  $J_{sc}$ , (b)  $V_{oc}$ , (c) FF and (d) PCE of all the cells.

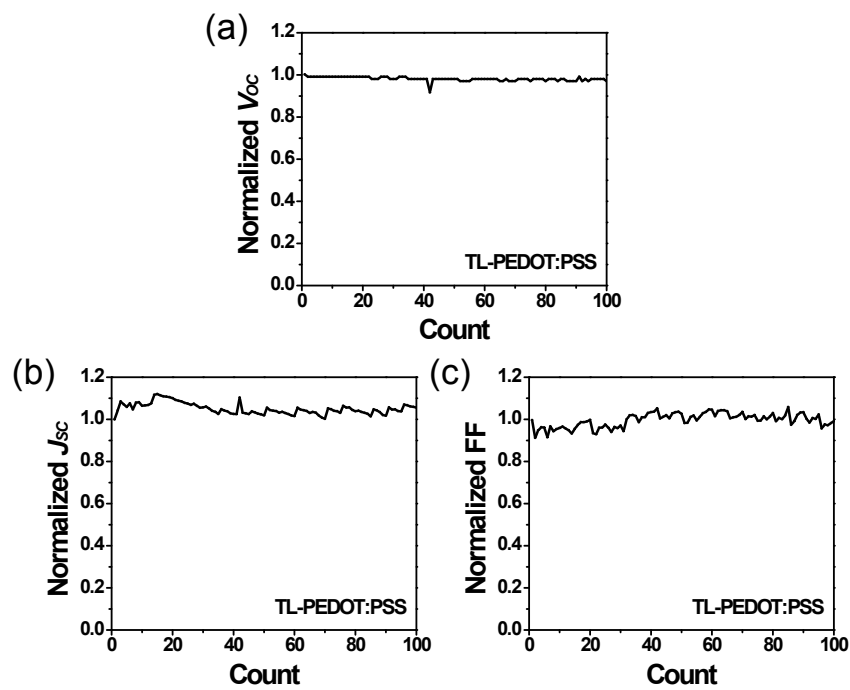

**Fig. S3** Normalized values of (a)  $V_{OC}$ , (b)  $J_{SC}$ , and (c) FF of PSCs after repeated detachment stability test.
